# Supplementary material
Source: bioRxiv or medRxiv preprint supplement (https://www.biorxiv.org/highwire/filestream/29191/field_highwire_adjunct_files/0/102459-1.pdf)
Supplement: Supplementary file [file 102459-1.pdf]

SUPPLEMENTARY INFORMATION

**Table S1** The percentage of sequences belonging to different bacterial phyla in the long-term warmed grassland (LWG) and the short-term warmed grassland (SWG)

| Phylum           | LWG (%) | SWG (%) |
|------------------|---------|---------|
| Proteobacteria   | 29      | 29      |
| Acidobacteria    | 25      | 18      |
| Actinobacteria   | 11      | 21      |
| Chloroflexi      | 7       | 6       |
| Verrucomicrobia  | 5.99    | 4.87    |
| Gemmatimonadetes | 3.57    | 2.90    |
| Bacteroidetes    | 2.57    | 3.25    |
| Firmicutes       | 2.44    | 3.52    |
| Nitrospirae      | 2.41    | 1.74    |
| WS3              | 1.54    | 1.32    |
| Planktomyces     | 0.85    | 1.19    |
| TM6              | 0.56    | 0.51    |
| TM7              | 0.47    | 0.51    |
| Chlamydiae       | 0.30    | 0.47    |
| Elusimicrobia    | 0.30    | 0.17    |
| OD1              | 0.29    | 0.23    |
| Armatimonadetes  | 0.22    | 0.16    |
| Cyanobacteria    | 0.18    | 0.14    |
| Chlorobi         | 0.16    | 0.18    |
| AD3              | 0.90    | 0.21    |
| Fibrobacteres    | 0.08    | 0.07    |
| Tenericutes      | 0.06    | 0.03    |
| Spirochaetes     | 0.04    | 0.02    |
| Undefined        | 4.85    | 3.94    |

**Table S2** The percentage of sequences belonging to different fungal functional groups in the long-term warmed grassland (LWG) and the short-term warmed grassland (SWG).

|                         | LWG   | SWG   |
|-------------------------|-------|-------|
| Filamentous saprotrophs | 66.40 | 61.08 |
| AMF                     | 6.28  | 5.44  |
| Yeasts                  | 1.87  | 7.83  |
| White rot saprotrophs   | 1.02  | 0.05  |
| Plant pathogens         | 0.77  | 0.52  |
| Ectomycorrhizal fungi   | 0.39  | 1.51  |
| Animal parasites        | 0.06  | 0.05  |
| Mycoparasites           | 0.02  | 0.06  |
| Unassigned              | 22.88 | 23.46 |

**Table S3** The results ANOVA analysis for differences in relative abundance of dominant bacterial and fungal groups (containing more than 2% of total number of sequences) from different soil warming levels in the long-term warmed grassland (LWG) and short-term warmed grassland (SWG).

|                     | LWG    |                | SWG    |                |
|---------------------|--------|----------------|--------|----------------|
|                     | P adj. | Transformation | P adj. | Transformation |
| <b>Bacteria</b>     |        |                |        |                |
| Alphaproteobacteria | 1      |                | 1      | log            |
| Betaproteobacteria  | 0.01   | box-cox        | <0.001 | box-cox        |
| Gammaproteobacteria | 1      | log            | 0.6    |                |
| Deltaproteobacteria | 0.22   | log            | 1      |                |
| Acidobacteria       | 1      | log            | 1      |                |
| Actinobacteria      | 0.44   | log            | 1      |                |
| Chloroflexi         | 1      | box-cox        | <0.001 |                |
| Verrucomicrobia     | 0.9    | log            | 1      |                |
| Gemmatimonadetes    | 1      |                | 1      | box-cox        |
| Bacteroidetes       | 1      |                | <0.001 | box-cox        |
| Firmicutes          | 1      | log            | 0.07   | box-cox        |
| <b>Fungi</b>        |        |                |        |                |
| Filamentous sapr.   | <0.001 | box-cox        | 0.002  | box-cox        |
| AMF                 | <0.001 | log            | 0.01   | log            |
| Yeasts              | 1      |                | 0.9    |                |

**Table S4** The differences in the relative abundance of dominant bacterial and fungal groups at different warming levels based on the post-hoc Tukey test (adjusted P values) in the long-term warmed grassland (LGW) and short-term warmed grassland (SWG).

|                     | $W_0 - W_{low}$ | $W_0 - W_{med}$ | $W_0 - W_{high}$ | $W_0 - W_{extr}$ |
|---------------------|-----------------|-----------------|------------------|------------------|
| <b>LGW bacteria</b> |                 |                 |                  |                  |
| Betaproteobacteria  | 0.42            | 1.00            | 0.24             | 0.01             |
| <b>SWG bacteria</b> |                 |                 |                  |                  |
| Betaproteobacteria  | 0.42            | 1.00            | 0.01             | <0.001           |
| Bacteroidetes       | 1.00            | 1.00            | 0.05             | <0.001           |
| Chloroflexi         | 1.00            | 0.65            | 1.00             | <0.001           |
| <b>LGW fungi</b>    |                 |                 |                  |                  |
| Fil. saprotrophs    | 1.00            | 1.00            | 1.00             | <0.001           |
| AMF                 | 1.00            | 1.00            | 0.87             | <0.001           |
| <b>SWG fungi</b>    |                 |                 |                  |                  |
| Fil. saprotrophs    | 0.18            | 0.01            | <0.001           | 0.41             |
| AMF                 | 1.00            | 0.16            | 0.03             | 0.03             |

\*  $W_0$  – ambient (+0°C to +1°C),  $W_{low}$  (+2°C to +3°C),  $W_{med}$  (+3°C to +5°C),  $W_{high}$  (+6°C to +9°C),  $W_{high'}$  (+7°C to +11°C),  $W_{extr}$  (+15°C to +19°C)

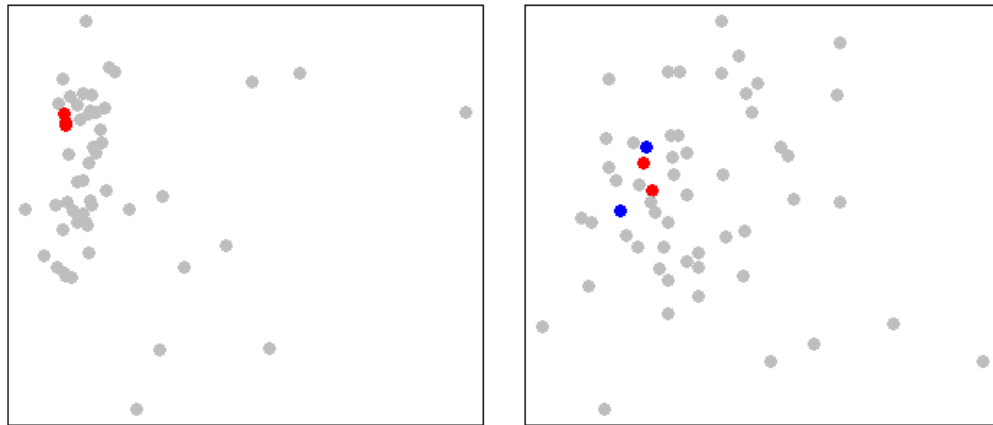

**Figure S1** NMDS ordination based on Bray-Curtis distances for: bacterial (left) and fungal (right) samples in the study. For bacterial communities red points indicate three technical replicates of the same sample and for fungal communities red and blue points indicate two technical replicates of two different samples. Relatively close clustering of technical replicates show the reproducibility of the sample preparation and sequencing procedure.

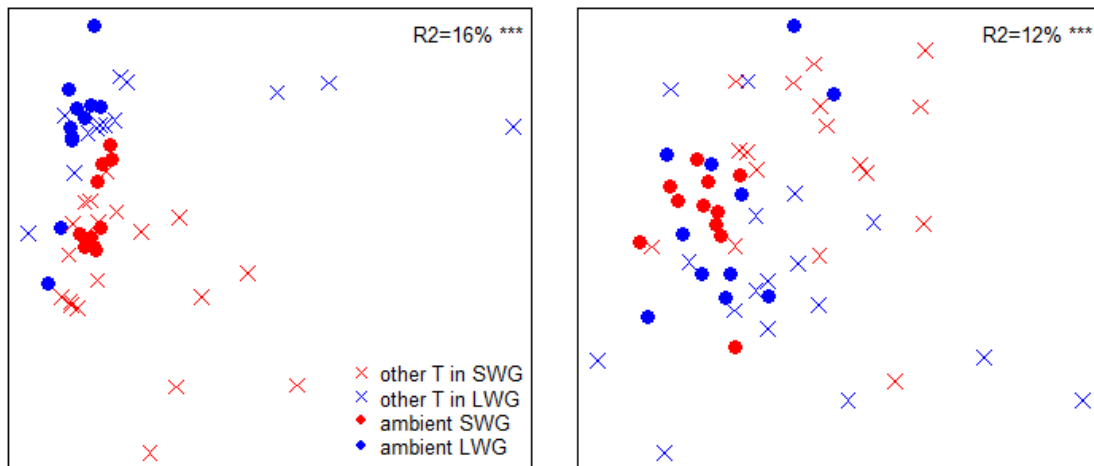

**Figure S2** The differences between bacterial (left) and fungal (right) communities at ambient temperatures in the two grasslands (LWG: long-term warmed grassland; SWG: short-term warmed grassland) based on NMDS and PERMANOVA analyses. \*\*\*  $P < 0.001$
